# Supplementary material for: Estimating the Physicochemical and Antioxidant Properties of Hardy Kiwi (Actinidia arguta) Treated with 1-Methylcyclopropene during Storage
Source: MDPI journal article supplement (doi:10.3390/agriculture13091665), 2023-08-23
Supplement: s1 [file s1]

Table S1. The *p*-value of the influence of individual experimental factors and interactions on the physicochemical properties of fruits.

|                             |                 | Firmness        | SSC          | Acidity      | Firmness      | SSC         | Acidity     |
|-----------------------------|-----------------|-----------------|--------------|--------------|---------------|-------------|-------------|
|                             |                 | 2015            |              |              | 2017          |             |             |
| Postharvest Treatment (A)   | +1-MCP          | 23.20 ± 9.83    | 12.45 ± 1.94 | 0.917 ± 0.05 | 21.49 ± 10.47 | 13.5 ± 1.80 | 0.84 ± 0.46 |
|                             | -1-MCP          | 11.70 ± 8.62    | 13.52 ± 1.94 | 0.836 ± 0.06 | 9.64 ± 8.74   | 15.0 ± 2.01 | 0.72 ± 0.39 |
|                             | <i>p</i> -value | <0.001          | 0.061        | <0.001       | <0.001        | 0.001       | <0.001      |
| Storage conditions (B)      | NA              | 12.50 ± 7.53    | 13.84 ± 1.77 | 0.864 ± 0.09 | 12.28 ± 9.20  | 14.9 ± 1.85 | 0.77 ± 0.09 |
|                             | ULO             | 22.41 ± 10.76   | 12.13 ± 1.78 | 0.888 ± 0.06 | 18.85 ± 12.25 | 13.6 ± 2.03 | 0.79 ± 0.15 |
|                             | <i>p</i> -value | <0.001          | 0.002        | 0.296        | 0.013         | 0.005       | 0.488       |
| Time of storage (weeks) (C) | 2               | 27.26 ± 8.14    | 10.45 ± 1.00 | 0.916 ± 0.03 | 31.42 ± 7.03  | 11.0 ± 0.93 | 0.92 ± 0.06 |
|                             | 4               | 19.12 ± 8.56    | 12.72 ± 1.37 | 0.922 ± 0.05 | 20.08 ± 7.89  | 13.3 ± 1.35 | 0.86 ± 0.05 |
|                             | 6               | 13.34 ± 8.31    | 14.24 ± 1.20 | 0.869 ± 0.07 | 15.79 ± 8.81  | 14.8 ± 1.73 | 0.83 ± 0.10 |
|                             | 8               | 10.07 ± 8.00    | 14.54 ± 0.87 | 0.799 ± 0.08 | 11.30 ± 8.43  | 15.7 ± 1.40 | 0.76 ± 0.08 |
|                             | 10              | -               | -            | -            | 7.74 ± 6.36   | 15.6 ± 0.99 | 0.69 ± 0.10 |
|                             | 12              | -               | -            | -            | 6.33 ± 4.99   | 15.0 ± 0.73 | 0.62 ± 0.14 |
| <i>p</i> -value             |                 | <0.001          | <0.001       | <0.001       | <0.001        | <0.001      | <0.001      |
| A*B                         |                 | <0.001          | 0.297        | 0.156        | <0.001        | 0.001       | 0.214       |
| A*C                         |                 | <i>p</i> -value | 0.352        | 0.014        | <0.001        | <0.001      | 0.001       |
| A*B*C                       |                 |                 | <0.001       | <0.001       | <0.001        | 0.012       | 0.630       |

SSC – soluble solids content; NA, conventional cold storage, 0.1% CO<sub>2</sub>:21.0% O<sub>2</sub>; ULO, ultra-low oxygen, 1.5% CO<sub>2</sub>:1.5% O<sub>2</sub>; 1-MCP, 1-methylcyclopropene; ±, standard deviation;

Table S2. The *p*-value of the influence of individual experimental factors and interactions on the content of mono and disaccharides in fruits.

|                             |                 | Glucose     | Fructose    | Sucrose     | Citric Acid  | Malic acid   |
|-----------------------------|-----------------|-------------|-------------|-------------|--------------|--------------|
| 2015                        |                 |             |             |             |              |              |
| Postharvest Treatment (A)   | +1-MCP          | 2.30 ± 0.43 | 2.59 ± 0.34 | 6.33 ± 0.31 | 0.621 ± 0.03 | 0.145 ± 0.01 |
|                             | -1-MCP          | 2.50 ± 0.48 | 2.88 ± 0.36 | 5.89 ± 0.34 | 0.567 ± 0.04 | 0.133 ± 0.02 |
|                             | <i>p</i> -value | 0.170       | 0.019       | <0.001      | <0.001       | 0.016        |
| Storage conditions (B)      | NA              | 2.50 ± 0.54 | 2.87 ± 0.46 | 5.96 ± 0.43 | 0.589 ± 0.05 | 0.134 ± 0.02 |
|                             | ULO             | 2.31 ± 0.41 | 2.60 ± 0.32 | 6.26 ± 0.33 | 0.599 ± 0.04 | 0.144 ± 0.02 |
|                             | <i>p</i> -value | 0.187       | 0.025       | 0.011       | 0.457        | 0.055        |
| Time of storage (weeks) (C) | 2               | 1.91 ± 0.07 | 2.36 ± 0.08 | 6.40 ± 0.35 | 0.639 ± 0.02 | 0.153 ± 0.00 |
|                             | 4               | 2.11 ± 0.11 | 2.55 ± 0.20 | 6.30 ± 0.26 | 0.602 ± 0.04 | 0.149 ± 0.01 |
|                             | 6               | 2.46 ± 0.14 | 2.75 ± 0.27 | 5.99 ± 0.29 | 0.572 ± 0.03 | 0.135 ± 0.01 |
|                             | 8               | 3.12 ± 0.29 | 3.29 ± 0.30 | 5.74 ± 0.36 | 0.562 ± 0.04 | 0.119 ± 0.02 |
|                             | 10              | -           | -           | -           | -            | -            |
|                             | 12              | -           | -           | -           | -            | -            |
|                             | <i>p</i> -value | <0.001      | <0.001      | <0.001      | <0.001       | <0.001       |
| A*B                         |                 | 0.135       | <0.001      | 0.002       | 0.001        | <0.001       |
| A*C                         |                 | <0.001      | <0.001      | 0.652       | <0.001       | <0.001       |
| A*B*C                       |                 | 0.204       | 0.193       | 0.266       | 0.131        | <0.001       |
| 2017                        |                 |             |             |             |              |              |
| Postharvest Treatment (A)   | +1-MCP          | 2.69 ± 0.46 | 3.19 ± 0.41 | 5.63 ± 0.30 | 0.73 ± 0.05  | 0.113 ± 0.01 |
|                             | -1-MCP          | 2.81 ± 0.39 | 3.31 ± 0.39 | 4.71 ± 0.46 | 0.65 ± 0.10  | 0.095 ± 0.02 |
|                             | <i>p</i> -value | 0.247       | 0.238       | <0.001      | <0.001       | <0.001       |
| Storage conditions (B)      | NA              | 2.84 ± 0.42 | 3.36 ± 0.43 | 4.96 ± 0.65 | 0.68 ± 0.10  | 0.101 ± 0.02 |
|                             | ULO             | 2.66 ± 0.43 | 3.15 ± 0.35 | 5.38 ± 0.45 | 0.70 ± 0.07  | 0.107 ± 0.01 |
|                             | <i>p</i> -value | 0.081       | 0.027       | 0.002       | 0.325        | 0.200        |
| Time of storage (weeks) (C) | 2               | 2.09 ± 0.09 | 2.65 ± 0.07 | 5.49 ± 0.47 | 0.78 ± 0.03  | 0.123 ± 0.00 |
|                             | 4               | 2.38 ± 0.17 | 2.91 ± 0.13 | 5.27 ± 0.55 | 0.75 ± 0.03  | 0.115 ± 0.01 |
|                             | 6               | 2.70 ± 0.20 | 3.17 ± 0.19 | 5.28 ± 0.48 | 0.72 ± 0.06  | 0.111 ± 0.01 |
|                             | 8               | 3.09 ± 0.20 | 3.54 ± 0.19 | 5.20 ± 0.53 | 0.67 ± 0.06  | 0.098 ± 0.01 |
|                             | 10              | 3.12 ± 0.12 | 3.59 ± 0.17 | 5.00 ± 0.58 | 0.64 ± 0.07  | 0.092 ± 0.02 |
|                             | 12              | 3.12 ± 0.14 | 3.64 ± 0.18 | 4.79 ± 0.69 | 0.59 ± 0.09  | 0.084 ± 0.02 |
|                             | <i>p</i> -value | <0.001      | <0.001      | 0.071       | <0.001       | <0.001       |
| A*B                         |                 | <0.001      | 0.001       | 0.002       | 0.003        | <0.001       |
| A*C                         |                 | <0.001      | <0.001      | 0.327       | <0.001       | <0.001       |
| A*B*C                       |                 | <0.001      | 0.001       | 0.825       | 0.831        | 0.173        |

SSC – soluble solids content; NA, conventional cold storage, 0.1% CO<sub>2</sub>:21.0% O<sub>2</sub>; ULO, ultra-low oxygen, 1.5% CO<sub>2</sub>:1.5% O<sub>2</sub>; 1-MCP, 1-methylcyclopropene; ±, standard deviation;

Table S3. The *p*-value of the influence of individual experimental factors and interactions on antioxidant properties of minikiwi.

|                             |                 | AA          | Ascorbic acid | TPC          | Phenolic acids | Flavonols   | Flavan-3-ols |
|-----------------------------|-----------------|-------------|---------------|--------------|----------------|-------------|--------------|
| 2015                        |                 |             |               |              |                |             |              |
| Postharvest Treatment (A)   | +1-MCP          | 0.97 ± 0.09 | 82.6 ± 6.4    | 97.8 ± 5.4   | 1.62 ± 0.23    | 5.39 ± 0.30 | 0.61 ± 0.04  |
|                             | -1-MCP          | 0.82 ± 0.11 | 70.6 ± 8.3    | 82.8 ± 9.0   | 1.55 ± 0.22    | 4.38 ± 0.65 | 0.47 ± 0.08  |
|                             | <i>p</i> -value | <0.001      | <0.001        | <0.001       | 0.235          | <0.001      | 0.001        |
| Storage conditions (B)      | NA              | 0.89 ± 0.13 | 75.7 ± 10.2   | 89.0 ± 7.1   | 1.52 ± 0.22    | 4.84 ± 0.65 | 0.52 ± 0.09  |
|                             | ULO             | 0.91 ± 0.09 | 77.6 ± 7.0    | 91.7 ± 11.8  | 1.65 ± 0.17    | 4.94 ± 0.65 | 0.55 ± 0.08  |
|                             | <i>p</i> -value | 0.466       | 0.458         | 0.359        | 0.024          | 0.596       | 0.279        |
| Time of storage (weeks) (C) | 2               | 0.95 ± 0.10 | 81.8 ± 6.9    | 95.8 ± 6.5   | 1.67 ± 0.11    | 5.18 ± 0.51 | 0.57 ± 0.06  |
|                             | 4               | 0.89 ± 0.10 | 76.1 ± 7.4    | 90.1 ± 8.4   | 1.63 ± 0.18    | 4.98 ± 0.54 | 0.56 ± 0.07  |
|                             | 6               | 0.87 ± 0.09 | 76.3 ± 9.8    | 88.8 ± 10.5  | 1.52 ± 0.25    | 4.67 ± 0.66 | 0.52 ± 0.09  |
|                             | 8               | 0.89 ± 0.13 | 72.2 ± 8.0    | 86.6 ± 10.8  | 1.51 ± 0.22    | 4.73 ± 0.74 | 0.50 ± 0.11  |
|                             | 10              | -           | -             | -            | -              | -           | -            |
|                             | 12              | -           | -             | -            | -              | -           | -            |
|                             | <i>p</i> -value | 0.380       | 0.063         | 0.127        | 0.168          | 0.199       | 0.271        |
| A*B                         |                 | 0.445       | 0.198         | 0.002        | 0.865          | 0.821       | 0.408        |
| A*C                         | <i>p</i> -value | 0.848       | 0.563         | 0.032        | 0.813          | 0.033       | 0.210        |
| A*B*C                       |                 | 0.950       | 0.987         | 0.621        | 0.983          | 0.716       | 0.977        |
| 2017                        |                 |             |               |              |                |             |              |
| Postharvest Treatment (A)   | +1-MCP          | 0.79 ± 0.05 | 73.6 ± 3.9    | 106.7 ± 6.3  | 2.14 ± 0.10    | 4.27 ± 0.27 | 0.52 ± 0.03  |
|                             | -1-MCP          | 0.69 ± 0.07 | 62.0 ± 6.1    | 85.0 ± 8.8   | 1.72 ± 0.21    | 3.45 ± 0.33 | 0.43 ± 0.04  |
|                             | <i>p</i> -value | <0.001      | <0.001        | <0.001       | <0.001         | <0.001      | <0.001       |
| Storage conditions (B)      | NA              | 0.73 ± 0.08 | 67.2 ± 9.0    | 95.2 ± 13.7  | 1.91 ± 0.27    | 3.76 ± 0.54 | 0.47 ± 0.06  |
|                             | ULO             | 0.75 ± 0.06 | 68.3 ± 6.2    | 96.5 ± 12.8  | 1.95 ± 0.26    | 3.96 ± 0.46 | 0.48 ± 0.06  |
|                             | <i>p</i> -value | 0.427       | 0.541         | 0.686        | 0.482          | 0.103       | 0.503        |
| Time of storage (weeks) (C) | 2               | 0.78 ± 0.04 | 73.8 ± 5.7    | 104.5 ± 10.0 | 2.14 ± 0.14    | 4.20 ± 0.40 | 0.51 ± 0.05  |
|                             | 4               | 0.77 ± 0.06 | 70.3 ± 5.5    | 99.1 ± 11.8  | 2.01 ± 0.18    | 3.94 ± 0.44 | 0.49 ± 0.05  |
|                             | 6               | 0.73 ± 0.05 | 67.1 ± 5.4    | 94.4 ± 12.7  | 1.90 ± 0.28    | 3.72 ± 0.54 | 0.46 ± 0.06  |
|                             | 8               | 0.74 ± 0.06 | 68.7 ± 6.7    | 98.3 ± 10.9  | 1.91 ± 0.22    | 3.96 ± 0.42 | 0.49 ± 0.06  |
|                             | 10              | 0.71 ± 0.07 | 64.5 ± 7.7    | 90.6 ± 12.0  | 1.83 ± 0.27    | 3.70 ± 0.45 | 0.45 ± 0.05  |
|                             | 12              | 0.70 ± 0.10 | 62.3 ± 8.9    | 88.4 ± 14.6  | 1.77 ± 0.31    | 3.63 ± 0.55 | 0.45 ± 0.07  |
|                             | <i>p</i> -value | 0.022       | 0.002         | 0.030        | 0.008          | 0.053       | 0.039        |
| A*B                         |                 | 0.042       | <0.001        | 0.739        | 0.062          | 0.430       | 0.846        |
| A*C                         | <i>p</i> -value | 0.003       | 0.002         | 0.086        | <0.001         | 0.163       | 0.440        |
| A*B*C                       |                 | 0.518       | 0.523         | 0.194        | 0.032          | 0.655       | 0.163        |

SSC – soluble solids content; NA, conventional cold storage, 0.1% CO<sub>2</sub>:21.0% O<sub>2</sub>; ULO, ultra-low oxygen, 1.5% CO<sub>2</sub>:1.5% O<sub>2</sub>; 1-MCP, 1-methylcyclopropene; ±, standard deviation;
